# Supplementary material
Source: MDPI journal article supplement (https://www.mdpi.com/2073-4395/11/10/1976)
Supplement: s1 [file s1]

**Table S1.** Historical weather conditions at the study site.

| Variable                                  | Value |
|-------------------------------------------|-------|
| Mean yearly minimum temperature (°C)      | 12.5  |
| Mean yearly maximum temperature (°C)      | 26.3  |
| Mean yearly minimum relative humidity (%) | 50.9  |
| Mean yearly maximum relative humidity (%) | 71.9  |
| Mean yearly cumulative rainfall (mm)      | 794   |
| Mean monthly rainfall (mm)                | 66.2  |

Source: Peshawar Metrological Department.

**Table S2.** *F* statistics of linear mixed models for the effects of wheat cultivars, sowing dates and irrigation regimes on growth and yield of wheat.

| Variables             | <i>F</i> values    |                    |                    |
|-----------------------|--------------------|--------------------|--------------------|
|                       | Cultivars (C)      | Sowing dates (SD)  | Irrigation (I)     |
| Days to tillering     | 22.2***            | 123***             | 0.12 <sup>ns</sup> |
| Days to jointing      | 173***             | 179***             | 1.58 <sup>ns</sup> |
| Days to heading       | 32.1***            | 205***             | 142***             |
| Days to anthesis      | 29.7***            | 264***             | 226***             |
| Days to maturity      | 62.5***            | 237***             | 200***             |
| Days to grain filling | 5.39*              | 1.24 <sup>ns</sup> | 1.22 <sup>ns</sup> |
| SPAD value            | 7.40**             | 6.99**             | 14.2***            |
| Chlorophyll a         | 2.30 <sup>ns</sup> | 77.9***            | 23.21***           |
| Chlorophyll b         | 1.00 <sup>ns</sup> | 76.0***            | 54.9***            |
| Carotenoids           | 1.05 <sup>ns</sup> | 1.04 <sup>ns</sup> | 0.86 <sup>ns</sup> |
| RWC                   | 0.82 <sup>ns</sup> | 10.2**             | 65.5***            |
| WSD                   | 0.37 <sup>ns</sup> | 7.90**             | 51.9***            |
| WUC                   | 6.37*              | 9.14**             | 4.94*              |
| WRC                   | 1.48 <sup>ns</sup> | 2.13 <sup>ns</sup> | 1.15 <sup>ns</sup> |
| Biological yield      | 523***             | 503***             | 3.18*              |
| Grain yield           | 164***             | 129***             | 18.6***            |

RWC=Relative water content, WSD=Water saturation deficit, WUC=Water uptake capacity, WRC=Water retention capacity; \**P*<0.05, \*\**P*<0.01, \*\*\**P*<0.001, ns=non-significant.
